# Supplementary material
Source: Springer Nature journal article supplement (https://www.springermedizin.de/resource/supplementary/12885_2011_2783_MOESM1_ESM.pdf/9461942)
Supplement: MOESM1 [file 9461942]

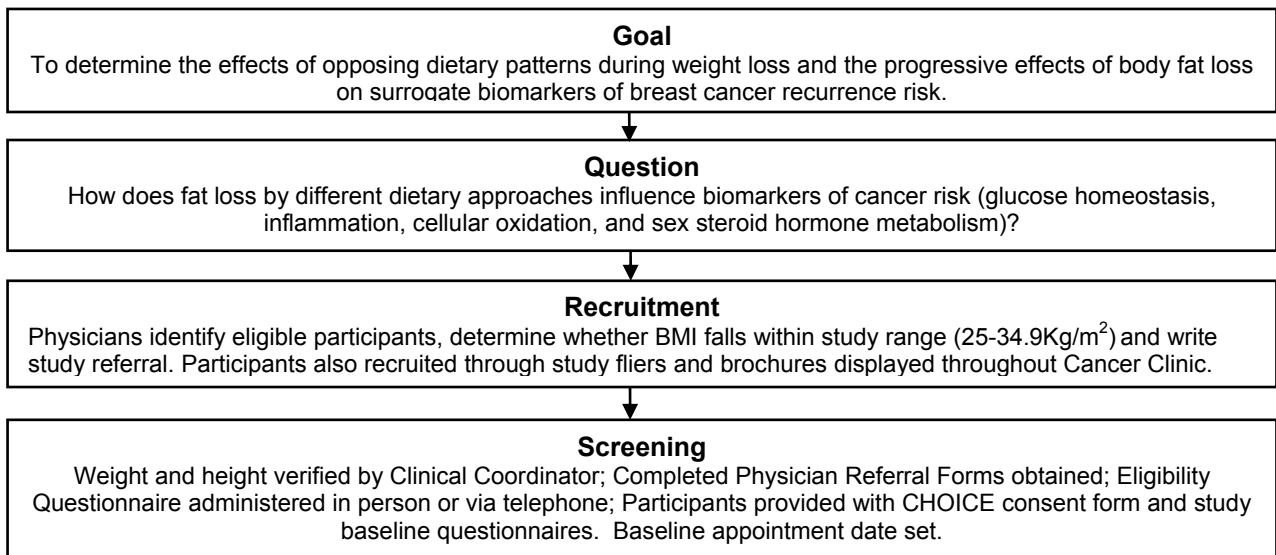

**Eligible Participants**

**Assignment by: BMI, tumor grade/stage, treatment type**

**Diet Allocation**

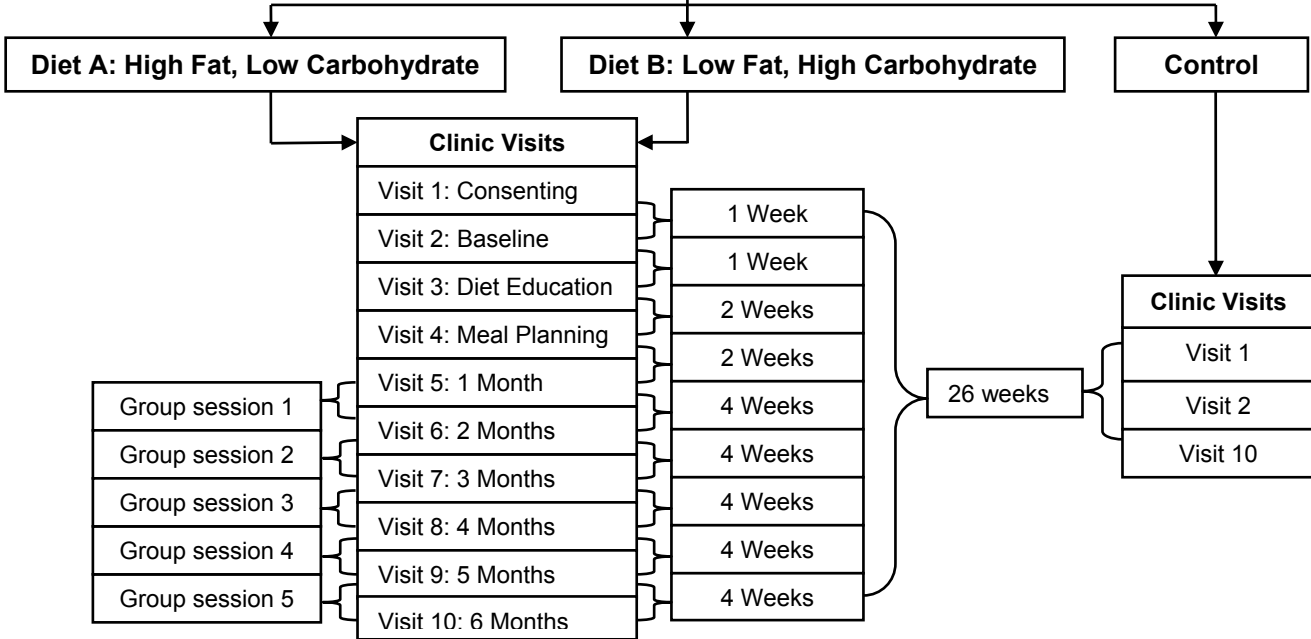

| <b>Endpoint Analysis: Blood and Urine</b>                                                      |                                                                                                                                                  |                                                                                                                                               |                                                                                                                                                                                                                                                                                    |
|------------------------------------------------------------------------------------------------|--------------------------------------------------------------------------------------------------------------------------------------------------|-----------------------------------------------------------------------------------------------------------------------------------------------|------------------------------------------------------------------------------------------------------------------------------------------------------------------------------------------------------------------------------------------------------------------------------------|
| <b>Serum</b><br>Proteomics,<br>Glycated Proteins,<br>CA27.29, CEA,<br>8-iso-F2α,<br>Creatinine | <b>Plasma</b><br>Carotenoids,<br>IGF-1, IGFBP-3,<br>IL-6, CRP,<br>Estradiol, TNF-α.<br>SHBG,<br>Metabolomics,<br>Adiponectin,<br>Ghrelin, Leptin | <b>RNA</b><br>Pathway specific arrays<br><b>DNA</b><br>Genotype<br><b>CPT</b><br><b>Lymphocytes</b><br>Comet,<br>8-hydroxy-<br>deoxyguanosine | <b>Anthropometric Measures</b><br>Weight<br>Waist to Hip ratio<br>Tanita Scale :Bioelectrical Impedance Analysis (BIA)<br>BOD POD: fat percentage, fat mass, lean muscle mass, Resting Metabolic Rate (RMR)<br>Pedometer (steps/day)<br>Actiheart Heart rate monitor/accelerometer |
